# Supplementary material for: Integrative Cell Type-Specific Multi-Omics Approaches Reveal Impaired Programs of Glial Cell Differentiation in Mouse Culture Models of DM1
Source: PubMed Central journal article supplement (PMC8136287; doi:10.3389/fncel.2021.662035), 2021-05-05
Supplement: Presentation_1.pdf [file Presentation_1.pdf]

## *Supplementary Material*

### **Integrative Cell Type-Specific Multi-Omics Approaches Reveal Impaired Programs of Glial Cell Differentiation in Mouse Culture Models of DM1**

Anchel González-Barriga<sup>1</sup>, Louison Lallemand<sup>1,†</sup>, Diana M. Dincă<sup>1,†</sup>, Sandra O. Braz<sup>1,2,†</sup>, Hélène Polvèche<sup>3,4</sup>, Paul Magneron<sup>1</sup>, Cédric Pionneau<sup>5</sup>, Aline Huguet-Lachon<sup>1</sup>, Jean-Baptiste Claude<sup>3</sup>, Cerina Chhuon<sup>6</sup>, Ida Chiara Guerrero<sup>6</sup>, Cyril F. Bourgeois<sup>3</sup>, Didier Auboeuf<sup>3</sup>, Geneviève Gourdon<sup>1</sup>, Mário Gomes-Pereira<sup>1,\*</sup>

<sup>1</sup> Sorbonne Université, Inserm, Institut de Myologie, Centre de Recherche en Myologie, F-75013 Paris, France.

<sup>2</sup> Inserm UMR1163, Institut Imagine, Université Paris Cité, F-75015 Paris, France.

<sup>3</sup> Laboratory of Biology and Modeling of the Cell, Université de Lyon, ENS de Lyon, Université Claude Bernard, CNRS UMR 5239, Inserm U1210, F-69007 Lyon, France.

<sup>4</sup> Inserm/UEVE UMR861, Université Paris Saclay I-STEM, F-91110 Corbeil-Essonnes, France.

<sup>5</sup> Sorbonne Université, Inserm, UMS PASS, Plateforme Post-génomique de la Pitié Salpêtrière (P3S), F-75013, Paris, France.

<sup>6</sup> Proteomics Platform Necker, Université de Paris - Structure Fédérative de Recherche Necker, Inserm US24/CNRS UMS3633, F-75015 Paris, France.

† These authors have contributed equally to this work.

#### **\*Correspondence:**

Mário Gomes-Pereira: [mario.pereira@inserm.fr](mailto:mario.pereira@inserm.fr)

## 1 Supplementary Data

### **Supplementary File 1. Phosphoproteomics data analysis of DMSXL astrocytes.**

List of phosphosites deregulated in DMSXL astrocytes, including gene names, protein and unique ID, with the adjusted *p* value, log<sub>2</sub> fold change in DMSXL cells compared to WT controls (Log<sub>2</sub>FC) and phosphorylation position of the corresponding amino acid in the peptide sequence (sequence window). Phosphosites uniquely detected in one condition were assigned an arbitrary *p* value of 2.4E-5 and Log<sub>2</sub>FC of +3 (if hyperphosphorylated), or -3 (if hypophosphorylated). Phosphoproteomics datasets generated for this study can also be found in the PRIDE repository: <http://www.ebi.ac.uk/pride/archive/projects/PXD025011>.

### **Supplementary File 2. Comparison of splicing dysregulation in DMSXL mouse brain cells and human DM1 frontal cortex.**

Orthologous exons dysregulated in DMSXL mouse cells (astrocytes and oligodendrocytes) and in human frontal cortex (Goodwin et al. 2015; Otero et al. 2021). Exons are numbered according to the FasterDB web interface (<http://fasterdb.ens-lyon.fr/faster/home.pl>). \*Exons dysregulated in opposite directions between DMSXL mouse cells and DM1 frontal cortex (inclusion/exclusion).

## 2 Supplementary Figures and Tables

### 2.1 Supplementary Tables

**Supplementary Table 1. Oligonucleotide primer sequences.**

| Genes symbols    | Aim                 | Alternative exon <sup>a</sup> | Exon Size (bp) | Oligonucleotide primer sequences (5'>3')                     |
|------------------|---------------------|-------------------------------|----------------|--------------------------------------------------------------|
| <i>Anxa5</i>     | Expression analysis | N/A                           | N/A            | ACTCCTGACCGACAGCATCAT<br>GCATCAGCCCTGCCATCAAAT               |
| <i>Itga3</i>     | Expression analysis | N/A                           | N/A            | ACGACTGTGAACGGATGGAC<br>GGGCACAGACCAGGACTCTA                 |
| <i>Polr2a</i>    | Expression analysis | N/A                           | N/A            | GGCTGTGCGGAAGGCTCTG<br>TGTCTGGCGGTTGACCC                     |
| <i>Serpina3n</i> | Expression analysis | N/A                           | N/A            | AGGAAACAGACCCAGGGGAT<br>GGCACCTTCCATTTGGCTTTA                |
| <i>Capzb</i>     | Splicing analysis   | 11                            | 113            | GCACGCTGAATGAGATCTACTTTG<br>CCGGTTAGCGTGAAGCAGAG             |
| <i>Inf2</i>      | Splicing analysis   | 22                            | 57             | CTGAGATACCCCGGATGCC<br>CCGACGAGAGCACTCACTTG                  |
| <i>Ktn1</i>      | Splicing analysis   | 41                            | 84             | TGAGAAGAGAAAAGAGAGCATTG<br>GTGTGTTTCATTTAACTGTGTCTTG         |
| <i>Myo9a</i>     | Splicing analysis   | 27                            | 213            | GCCCCAAAACAAGATGAATCAGC<br>CAGAAAATGGATGAGCAGGTGTC           |
| <i>Numa1</i>     | Splicing analysis   | 16                            | 42             | GACCCACTTGGCTGAAATGC<br>GTCAGCTTCTACTTAGTTCTTCC              |
| <i>Palm</i>      | Splicing analysis   | 8                             | 132            | GGAGCAAAAGTCAGAAACCTTGG<br>TTGTGAATGAGTTCGTCCACCTC           |
| <i>Sorbs1</i>    | Splicing analysis   | 27                            | 168            | CCAGCTGATTACTTGGAGTCCACAGAAG<br>GTTACCTTCATACCAGTTCTGGTCAATC |
| <i>Tnik1</i>     | Splicing analysis   | 16                            | 87             | GGCACTACGAAGAACAGATGCC<br>GCTGAACCCCACTAATGCTGAAG            |

<sup>a</sup>Alternative exons are numbered according to the FasterDB web interface (<http://fasterdb.ens-lyon.fr/faster/home.pl>).

**Supplementary Table 2. Expression levels of human genes in the transgene, relative to mouse endogenous orthologues.** Mean number of *Fbxl7* transcripts per million is shown. Data are mean ( $\pm$ SEM). N/D, not detected.

|                  | Neurons         |                  | OPC             |                 | OL              |                 | Astrocytes      |                 |
|------------------|-----------------|------------------|-----------------|-----------------|-----------------|-----------------|-----------------|-----------------|
|                  | WT              | DMSXL            | WT              | DMSXL           | WT              | DMSXL           | WT              | DMSXL           |
| <i>DMPK/Dmpk</i> |                 | 0.53 $\pm$ 0.16  | 0               | 0.40 $\pm$ 0.03 | 0               | 0.63 $\pm$ 0.02 | 0               | 2.21 $\pm$ 0.59 |
| <i>DMWD/Dmwd</i> | 0               | 0.03 $\pm$ 0.002 | 0               | 0.08 $\pm$ 0.02 | 0               | 0.17 $\pm$ 0.01 | 0               | 1.08 $\pm$ 0.10 |
| <i>SIX5/Six5</i> | 0               | 16.06 $\pm$ 4.78 | 0               | 2.69 $\pm$ 0.16 | 0               | 3.60 $\pm$ 0.33 | 0               | 5.97 $\pm$ 1.24 |
| <i>Fbxl7</i>     | 0.18 $\pm$ 0.02 | N/D              | 0.67 $\pm$ 0.08 | 0.04 $\pm$ 0.02 | 0.70 $\pm$ 0.09 | 0.05 $\pm$ 0.02 | 4.59 $\pm$ 0.35 | 0.50 $\pm$ 0.07 |

**Supplementary Table 3. Gene ontology analysis of genes differentially expressed in DMSXL OL.** The most highly enriched, non-redundant, significant terms in each ontology are listed. A maximum of five terms are shown per ontology (biological process, cellular component and molecular function), in decreasing order of enrichment ratio.

| GO code                   | Term                                 | Enrichment ratio | FDR     |
|---------------------------|--------------------------------------|------------------|---------|
| <b>Biological process</b> |                                      |                  |         |
| GO:0031579                | Membrane draft organization          | 27.1             | 2.0E-02 |
| GO:0031589                | Cell-substrate adhesion              | 6.5              | 2.2E-03 |
| GO:0048771                | Tissue remodeling                    | 6.4              | 2.9E-02 |
| GO:0043062                | Extracellular structure organization | 5.2              | 2.9E-02 |
| GO:0045785                | Response to wounding                 | 4.4              | 1.6E-02 |
| <b>Cellular component</b> |                                      |                  |         |
| GO:0031012                | Extracellular matrix                 | 7.6              | 1.5E-10 |
| <b>Molecular function</b> |                                      |                  |         |
| GO:0048306                | Calcium-dependent protein binding    | 12.4             | 5.8E-03 |
| GO:0005539                | Glycosaminoglycan binding            | 6.9              | 5.8E-03 |
| GO:1901681                | Sulfur compound binding              | 6.4              | 5.8E-03 |

**Supplementary Table 4. Gene ontology analysis of genes differentially spliced in DMSXL astrocytes.** The most highly enriched, non-redundant, significant terms associated with transcripts showing at least one type of splicing change in primary DMSXL astrocytes (single or multiple exon skipping, mutually exclusive exons, switch of acceptor or donor sites). A maximum of five terms are shown per ontology (biological process, cellular component and molecular function), in decreasing order of enrichment ratio.

| GO code                   | Term                                                                 | Enrichment ratio | FDR     |
|---------------------------|----------------------------------------------------------------------|------------------|---------|
| <b>Biological process</b> |                                                                      |                  |         |
| GO:0051646                | Mitochondrion localization                                           | 8.7              | 1.3E-02 |
| GO:0031122                | Cytoplasmic microtubule organization                                 | 6.4              | 2.8E-02 |
| GO:0035418                | Protein localization to synapse                                      | 5.9              | 1.1E-02 |
| GO:0099072                | Regulation of postsynaptic membrane neurotransmitter receptor levels | 5.2              | 1.5E-03 |
| GO:0030048                | Actin filament-based movement                                        | 4.8              | 2.2E-02 |
| <b>Cellular component</b> |                                                                      |                  |         |
| GO:0097386                | Glial cell projection                                                | 8.2              | 1.6E-02 |
| GO:0005905                | Clathrin-coated pit                                                  | 6.3              | 2.3E-03 |
| GO:0048786                | Presynaptic active zone                                              | 3.9              | 3.8E-02 |
| GO:0030055                | Cell substrate junction                                              | 3.8              | 4.7E-03 |
| GO:0005874                | Microtubule                                                          | 3.5              | 6.2E-05 |
| <b>Molecular function</b> |                                                                      |                  |         |
| GO:0071814                | Protein-lipid complex binding                                        | 11.3             | 1.8E-02 |
| GO:0019894                | Kinesin binding                                                      | 8.5              | 4.1E-03 |
| GO:0030165                | PDZ domain binding                                                   | 5.7              | 1.1E-03 |
| GO:0017124                | SH3 domain binding                                                   | 4.7              | 1.8E-02 |
| GO:0050839                | Cell adhesion molecule binding                                       | 3.8              | 1.2E-03 |

**Supplementary Table 5. Gene ontology analysis of proteins differentially phosphorylated in DMSXL astrocytes.** The most highly enriched, non-redundant, significant terms associated with proteins exhibiting phosphorylation changes in at least one phosphosite in primary DMSXL astrocytes. A maximum of five terms are shown per ontology (biological process, cellular component and molecular function), in decreasing order of enrichment ratio.

| GO code            | Term                               | Enrichment ratio | FDR     |
|--------------------|------------------------------------|------------------|---------|
| Biological process |                                    |                  |         |
| GO:0030010         | Establishment of cell polarity     | 4.9              | 3.3E-03 |
| GO:0000902         | Cell morphogenesis                 | 2.3              | 3.3E-03 |
| GO:0007010         | Cytoskeleton organization          | 2.1              | 3.3E-03 |
| GO:0048869         | Cellular developmental process     | 1.6              | 9.7E-03 |
| GO:0023052         | Signaling                          | 1.5              | 9.7E-03 |
| Cellular component |                                    |                  |         |
| GO:0005913         | Astrocyte projection               | 9.9              | 3.3E-02 |
| GO:0005912         | Cell-cell adherens junction        | 6.5              | 2.6E-06 |
| GO:0097458         | Intermediate filament cytoskeleton | 4.3              | 3.3E-02 |
| GO:0044456         | Cortical actin cytoskeleton        | 4.1              | 2.1E-02 |
| GO:0098590         | Clathrin-coated pit                | 3.8              | 3.2E-02 |
| Molecular function |                                    |                  |         |
| GO:0003779         | Actin binding                      | 2.7              | 5.4E-03 |
| GO:0017022         | Myosin binding                     | 5.0              | 1.3E-02 |
| GO:0051020         | GTPase binding                     | 2.2              | 1.8E-02 |
| GO:0030551         | Cyclic nucleotide binding          | 13.7             | 3.8E-02 |
| GO:0015631         | Tubulin binding                    | 2.6              | 3.9E-02 |

## 2.2 Supplementary Figures

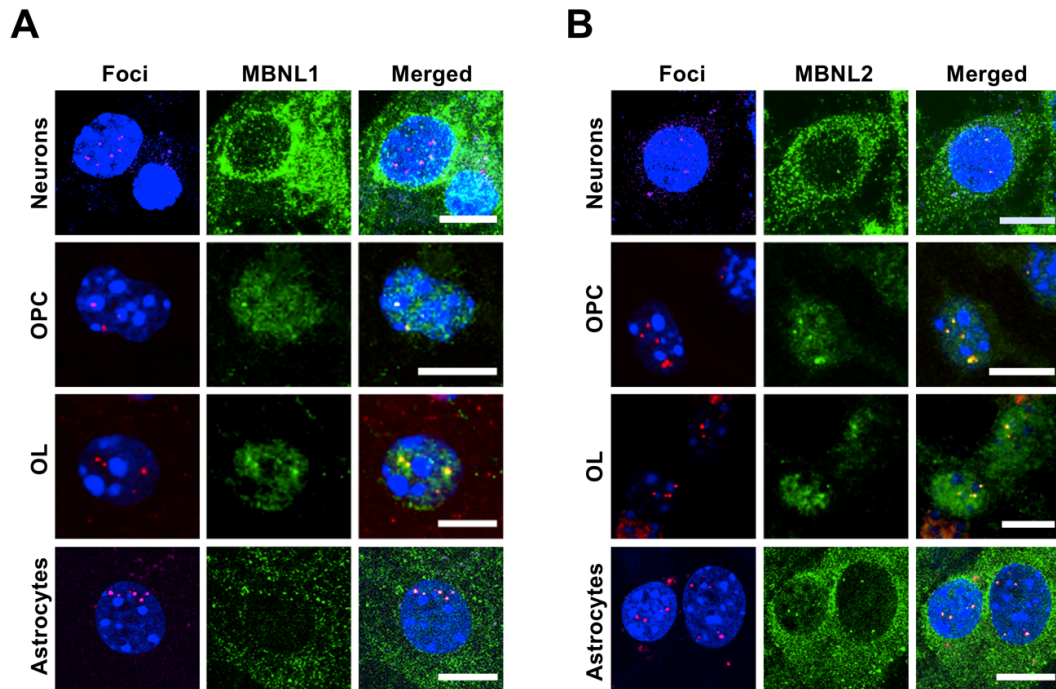

**Supplementary Figure 1. MBNL co-localization with nuclear RNA foci in primary DMSXL mouse brain cells.** Representative images of neurons, OPC, OL and astrocytes showing the co-localization of RNA foci with either MBNL1 (**A**) or MBNL2 (**B**). Scale bars represent 10  $\mu$ m.

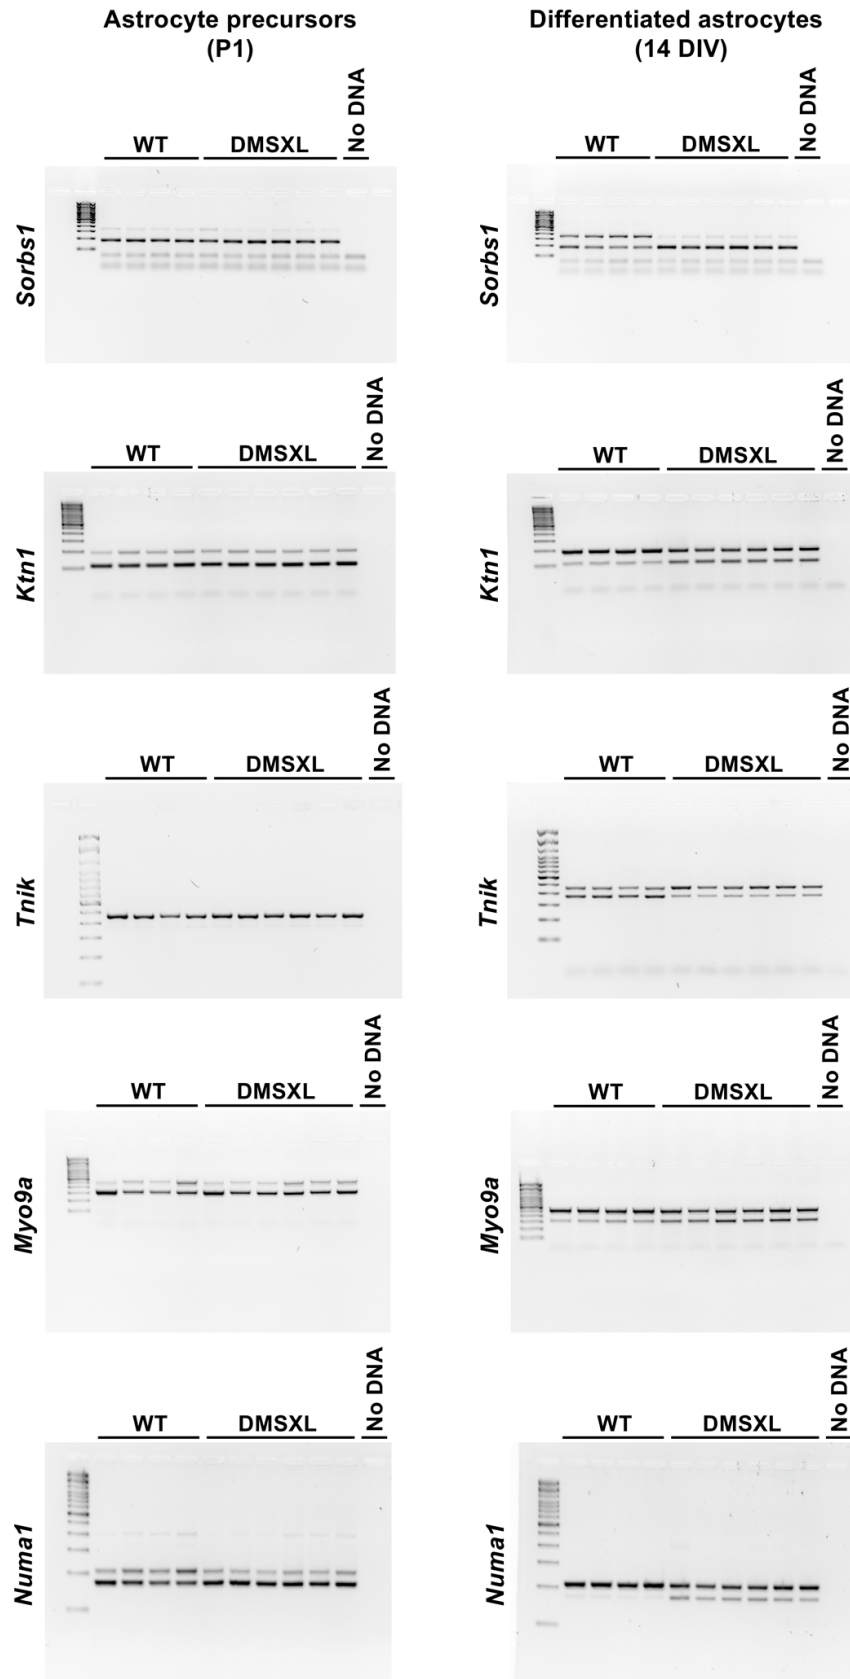



**Supplementary Figure 2. RT-PCR analysis of alternative splicing in primary DMSXL astrocytes.**  
Uncropped images used to prepare Figure 5. Image display inverted for better visualization. MW  
Ladder: GeneRuler 100 bp DNA Ladder (Thermo Fisher, SM0244).

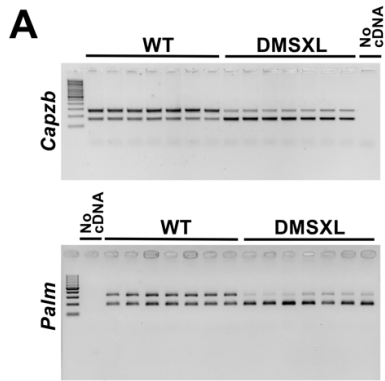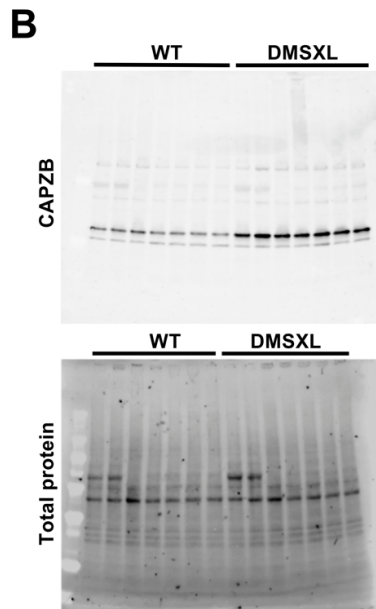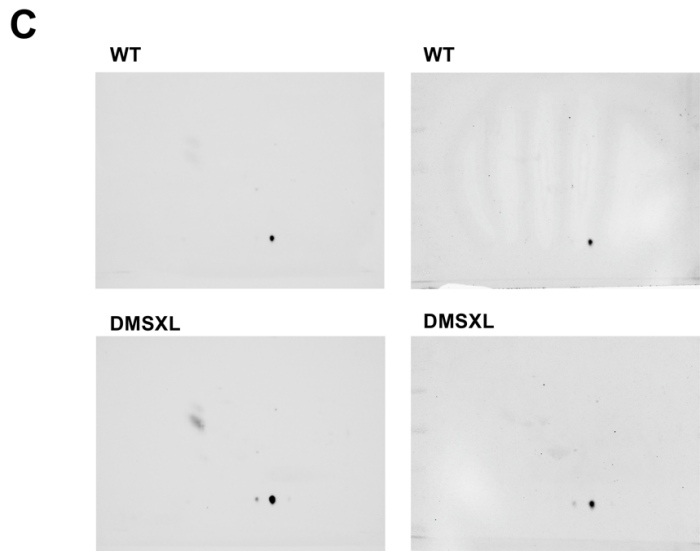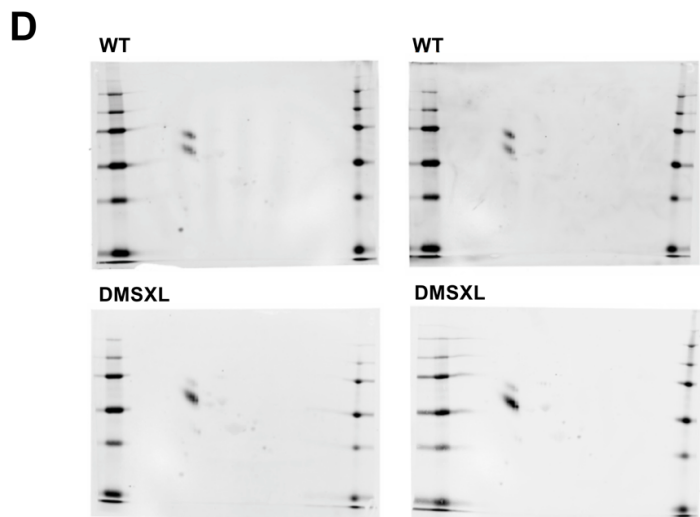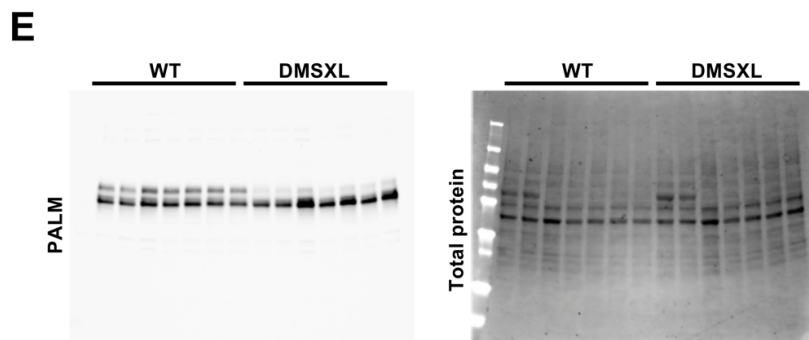

**Supplementary Figure 3. Analysis of splicing, phosphorylation and total protein levels of CAPZB and PALM in DMSXL astrocytes.** Uncropped images used to prepare Figure 7. **(A)** Images of RT-PCR splicing analysis of mouse *Capzb* and *Palm* transcripts in primary mouse astrocytes. Image display inverted for better visualization. MW Ladder: GeneRuler 100 bp DNA Ladder (Thermo Fisher, SM0244). **(B)** Images of CAPZB western blot detection and total protein. MW Ladder: PageRuler Plus Prestained Protein Ladder (Thermo Scientific, 26619). **(C)** Images of CAPZB two-dimension western blot. Image display inverted for better visualization. MW Ladder: Precision Plus All Blue (Bio-Rad, 161-0373). **(D)** Images of PALM two-dimension western blot. Image display inverted for better visualization. MW Ladder: Precision Plus All Blue (Bio-Rad, 161-0373). **(E)** Images of PALM western blot detection and total protein. MW Ladder: PageRuler Plus Prestained Protein Ladder (Thermo Scientific, 26619).

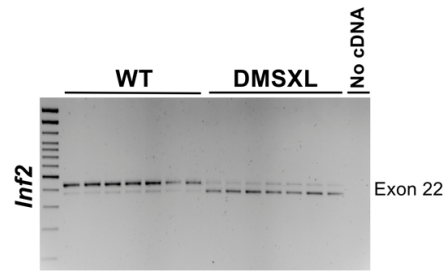

**Supplementary Figure 4. Splicing analysis of *Inf2* in DMSXL astrocytes.** Uncropped image of gel electrophoresis analysis of mouse *Inf2* isoforms in WT and DMSXL astrocytes (n = 7 independent cultures, per genotype). Alternative exon is indicated on the right. Image display inverted for better visualization. MW Ladder: GeneRuler 100 bp DNA Ladder (Thermo Fisher, SM0244).

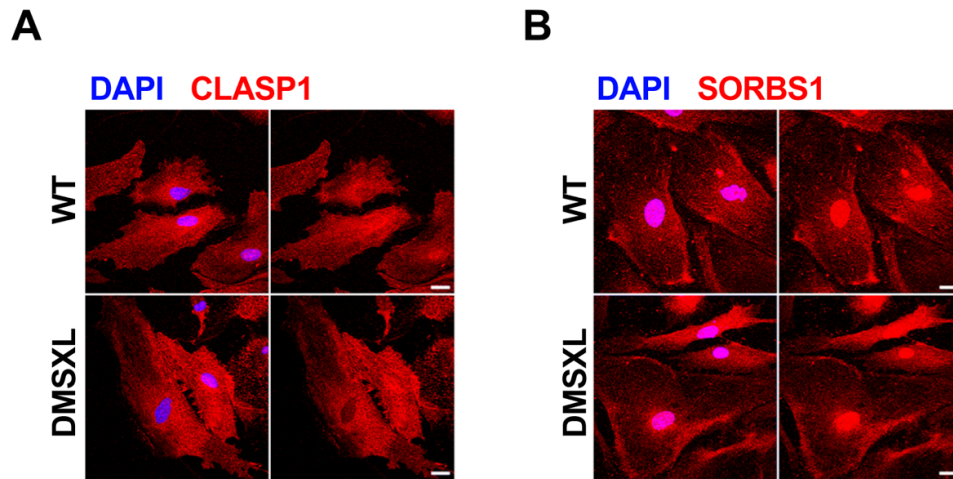

**Supplementary Figure 5. Localization of CLASP1 and SORBS1 proteins in DMSXL astrocytes.** Representative confocal images of the localization of (A) CLASP1 and (B) SORBS1 proteins in primary DMSXL and WT astrocytes. No obvious difference in protein intracellular distribution was detected between the two genotypes. Scale bars represent 20  $\mu\text{m}$ .
